# Supplementary material for: Diet Quality and Water Scarcity: Evidence from a Large Australian Population Health Survey
Source: Nutrients. 2019 Aug 9;11(8):1846. doi: 10.3390/nu11081846 (PMC6723970; doi:10.3390/nu11081846)
Supplement: Supplementary file 1 [file nutrients-11-01846-s001.pdf]

## **Supplementary Information**

### **Diet quality and water scarcity: Evidence from a large Australian population health survey**

Bradley G. Ridoutt<sup>1,2,\*</sup>, Danielle Baird<sup>3</sup>, Kimberley Anastasiou<sup>3</sup> and Gilly A. Hendrie<sup>3</sup>

<sup>1</sup> Commonwealth Scientific and Industrial Research Organisation (CSIRO) Agriculture and Food, Clayton South, Victoria, Australia.

<sup>2</sup> University of the Free State, Department of Agricultural Economics, Bloemfontein, South Africa.

<sup>3</sup> CSIRO Health and Biosecurity, Adelaide, South Australia, Australia.

\*Correspondence: [brad.ridoutt@csiro.au](mailto:brad.ridoutt@csiro.au); Tel.: +61 3 9545 2159

## **Contents**

|                                                                              |    |
|------------------------------------------------------------------------------|----|
| Supplementary Table 1: Number of male and female participants                | 3  |
| Supplementary Table 2: Age distribution of participants                      | 4  |
| Supplementary Table 3: Number of individuals in the quadrant analysis        | 5  |
| Supplementary Table 4: Water-scarcity footprint of imported commodities      | 6  |
| Supplementary Table 5: Generic aquaculture feed ration                       | 7  |
| Supplementary Table 6: Data sources for food processing                      | 8  |
| Supplementary Table 7: Specific gravity of common foods                      | 9  |
| Supplementary Table 8: Generic recipes used for food products                | 10 |
| Supplementary Table 9: Water-scarcity footprint of individual foods          | 16 |
| Supplementary Table 10: All water-scarcity footprint results                 | 20 |
| Supplementary Table 11: Contribution analysis – WSI_HH_EQ                    | 21 |
| Supplementary Table 12: Contribution analysis – WORLD_EQ                     | 22 |
| Supplementary Table 13: Contribution analysis – AWARE                        | 23 |
| Supplementary Table 14: Food intake and water-scarcity footprint – WSI_HH_EQ | 24 |
| Supplementary Table 15: Food intake and water-scarcity footprint – WORLD_EQ  | 25 |
| Supplementary Table 16: Food intake and water-scarcity footprint – AWARE     | 26 |
| Supplementary references                                                     | 27 |

**Supplementary Table 1** Number of male and female participants in the study

|                             | Male  | Female | Total |
|-----------------------------|-------|--------|-------|
| Adults (19 years and older) | 4,282 | 5,059  | 9,341 |
| %                           | 45.8  | 54.2   | 100   |

**Supplementary Table 2** Age distribution of participants in the study. Age categories are defined according to the Australian dietary guidelines [1].

| Age (years) | Count |
|-------------|-------|
| 19 to 50    | 5,157 |
| 51 to 70    | 2,906 |
| 71+         | 1,278 |
| Total       | 9,341 |

**Supplementary Table 3** Number of 19-50 year old adults in the quadrant analysis. Results are presented for 3 water-scarcity models, denoted WSI\_HH\_EQ [2], World\_EQ [3] and AWARE [4]. HDQ and LDQ refer to higher and lower diet quality, respectively. HWF and LWF refer to higher and lower water-scarcity footprint, respectively.

| Water-scarcity model | Quadrant       | Count |
|----------------------|----------------|-------|
| WSI_HH_EQ            | LDQ-LWF        | 1,253 |
|                      | LDQ-HWF        | 585   |
|                      | HDQ-LWF        | 683   |
|                      | HDQ-HWF        | 886   |
|                      | Within 0.25 SD | 1,750 |
| World_EQ             | LDQ-LWF        | 1,313 |
|                      | LDQ-HWF        | 538   |
|                      | HDQ-LWF        | 681   |
|                      | HDQ-HWF        | 916   |
|                      | Within 0.25 SD | 1,709 |
| AWARE                | LDQ-LWF        | 1,327 |
|                      | LDQ-HWF        | 511   |
|                      | HDQ-LWF        | 715   |
|                      | HDQ-HWF        | 867   |
|                      | Within 0.25 SD | 1,737 |

**Supplementary Table 4** Water-scarcity footprint (L-eq kg<sup>-1</sup>) of imported agricultural commodities calculated using three water-scarcity models: WSI\_HH\_EQ [2], World\_EQ [3] and AWARE [4]. Agricultural water consumption data [5].

| Commodity            | Water-scarcity model |          |       | Main countries of production                                  |
|----------------------|----------------------|----------|-------|---------------------------------------------------------------|
|                      | WSI_HH_EQ            | World_EQ | AWARE |                                                               |
| Tea leaves           | 4290                 | 3462     | 2414  | China, India, Indonesia, Sri Lanka                            |
| Coffee (green)       | 1078                 | 911      | 645   | Brazil, Colombia, India, Indonesia, Papua New Guinea, Vietnam |
| Hops                 | 20.1                 | 91.3     | 78.3  | Czech Republic, Germany, New Zealand                          |
| Palm oil             | 1.4                  | 5.3      | 5.2   | Indonesia, Malaysia                                           |
| Cocoa beans          | 561                  | 335      | 1817  | Brazil, Cameroon, Cote d'Ivoire, Ghana, Indonesia             |
| Hazelnut             | 1606                 | 3143     | 3822  | Turkey, Italy                                                 |
| Coconut (desiccated) | 319                  | 1275     | 303   | Thailand, Philippines                                         |

Note: Results presented using the AWARE water-scarcity model have been divided by 42.95, the global average value.

**Supplementary Table 5** Generic aquaculture feed ration. Data sources [6-7].

| Component                      | kg per kg aquaculture production |
|--------------------------------|----------------------------------|
| Fish meal                      | 0.30                             |
| Fish oil                       | 0.13                             |
| Plant-based ingredients        | 0.36                             |
| Winter cereal (50%)            |                                  |
| Vegetable oil (20%)            |                                  |
| Oilseed meal (30%)             |                                  |
| Other animal-based ingredients | 0.52                             |
| Chicken meal (100%)            |                                  |
| Total                          | 1.30                             |

**Supplementary Table 6** Data sources for water use in food processing.

| Process              | Data sources |
|----------------------|--------------|
| Meat processing      | 8-11         |
| Dairy processing     | 12           |
| Vegetable processing | 13           |
| Fruit processing     | 14-17        |
| Nut processing       | 18           |
| Oilseed processing   | 18-19        |
| Legume processing    | 19           |
| Grain processing     | 18-19        |
| Sugar processing     | 19           |
| Beverage processing  | 20           |
| Food manufacturing   |              |
| Margarine            |              |
| Cereal products      | 21           |
| Bakery products      |              |
| Processed meat       |              |
| Other foods          |              |
| Seafood processing   | 22           |

**Supplementary Table 7** Specific gravity of common foods and beverages. Source [23].

| Product                               | Specific gravity |
|---------------------------------------|------------------|
| Water                                 | 1.000            |
| Carbonated soft drink                 | 1.041            |
| Sports drink                          | 1.041            |
| Apple juice                           | 1.041            |
| Orange juice                          | 1.041            |
| Other citrus juice                    | 1.052            |
| Grape juice                           | 1.052            |
| Pineapple juice                       | 1.052            |
| Wine                                  | 0.994            |
| Beer                                  | 1.006            |
| Spirits                               | 0.955            |
| Cider                                 | 1.008            |
| Milk, whole                           | 1.030            |
| Milk, flavoured                       | 1.057            |
| Rice beverage                         | 1.049            |
| Soy beverage                          | 1.033            |
| Cordial, concentrate, not juice based | 1.672            |
| Cordial, concentrate, juice based     | 1.580            |
| Tomato sauce                          | 1.036            |

**Supplementary Table 8** Generic recipes used for food products

| Food                                                 | Ingredient                                 | g 100g <sup>-1</sup> |
|------------------------------------------------------|--------------------------------------------|----------------------|
| Popcorn                                              | Corn                                       | 70                   |
|                                                      | Vegetable oil                              | 30                   |
| Balsamic vinegar                                     | Fermented grapes                           | 10                   |
|                                                      | Water                                      | 90                   |
|                                                      | Vegetable juice                            | 45                   |
| Juice, fruit & vegetable blend                       | Apple juice                                | 25                   |
|                                                      | Lemon juice                                | 5                    |
|                                                      | Orange juice                               | 25                   |
| Sausages                                             | Meat                                       | 75                   |
|                                                      | Corn flour                                 | 5                    |
|                                                      | Rice flour                                 | 5                    |
|                                                      | Water                                      | 15                   |
| Liquorice                                            | Flour, wheat                               | 30                   |
|                                                      | Sugar                                      | 35                   |
|                                                      | Water                                      | 20                   |
| Rice cake                                            | Molasses                                   | 15                   |
|                                                      | Rice, brown                                | 99                   |
|                                                      | Vegetable oil                              | 1                    |
| Muesli or snack bar, with chocolate chips or coating | Muesli bar with chocolate chips or coating | 80                   |
|                                                      | Milk chocolate                             | 20                   |
| Soy sauce                                            | Soybeans                                   | 20                   |
|                                                      | Water                                      | 80                   |
|                                                      | Sugar                                      | 10                   |
| Mayonnaise, regular fat                              | Egg                                        | 5                    |
|                                                      | Vegetable oil                              | 65                   |
|                                                      | Vinegar                                    | 5                    |
|                                                      | Water                                      | 15                   |
| Extruded snack, cheese flavour                       | Corn flour                                 | 35                   |
|                                                      | Rice flour                                 | 35                   |
|                                                      | Whey powder                                | 7                    |
|                                                      | Palm oil                                   | 23                   |
|                                                      | Sugar                                      | 50                   |
| Hazelnut spread                                      | Palm oil                                   | 23                   |
|                                                      | Hazelnut                                   | 13                   |
|                                                      | Skim milk powder                           | 7                    |
|                                                      | Cocoa powder                               | 7                    |
|                                                      | Pastry                                     | 40                   |
| Pasty filled with vegetable & meat                   | Starchy root vegetable                     | 35                   |
|                                                      | Beef                                       | 10                   |
|                                                      | Vegetable oil                              | 5                    |
|                                                      | Water                                      | 10                   |
| Custard                                              | Milk                                       | 89                   |

|                                                           |                     |    |
|-----------------------------------------------------------|---------------------|----|
|                                                           | Sugar               | 6  |
|                                                           | Thickener, flavours | 5  |
|                                                           | Custard             | 38 |
| Danish pastry with custard filling                        | Egg                 | 8  |
|                                                           | Pastry              | 48 |
|                                                           | Sugar               | 6  |
|                                                           | Apple               | 58 |
|                                                           | Lemon juice         | 1  |
| Apple pie                                                 | Pastry              | 35 |
|                                                           | Sugar               | 5  |
|                                                           | Bacon               | 13 |
|                                                           | Cheese              | 9  |
|                                                           | Cream               | 23 |
| Quiche Lorraine                                           | Egg                 | 15 |
|                                                           | Milk                | 10 |
|                                                           | Onion               | 7  |
|                                                           | Pastry              | 23 |
|                                                           | Pastry              | 50 |
| Meat pie                                                  | Beef                | 25 |
|                                                           | Corn flour          | 5  |
|                                                           | Water               | 20 |
|                                                           | Egg                 | 2  |
|                                                           | Margarine           | 9  |
| Pastry (shortcrust)                                       | Palm oil            | 9  |
|                                                           | Flour, wheat        | 63 |
|                                                           | Sugar               | 5  |
|                                                           | Water               | 13 |
|                                                           | Egg                 | 14 |
| Muffin, cake style with berry, commercial, un-iced        | Vegetable oil       | 17 |
|                                                           | Flour, wheat        | 20 |
|                                                           | Milk                | 17 |
|                                                           | Berries             | 14 |
|                                                           | Sugar               | 19 |
| Cake or cupcake, chocolate, commercial, sugar-based icing | Cocoa               | 5  |
|                                                           | Egg                 | 11 |
|                                                           | Flour, wheat        | 16 |
|                                                           | Milk                | 4  |
|                                                           | Palm oil            | 13 |
| Cake, lamington, unfilled                                 | Sugar               | 37 |
|                                                           | Water               | 13 |
|                                                           | Madeira cake        | 62 |
|                                                           | Coconut             | 8  |
|                                                           | Sugar               | 14 |
|                                                           | Cocoa               | 5  |
|                                                           | Vegetable oil       | 1  |

|                                                    |                   |     |
|----------------------------------------------------|-------------------|-----|
|                                                    | Other             | 10  |
|                                                    | Mixed dried fruit | 36  |
|                                                    | Flour, wheat      | 36  |
| Cake, fruit, commercial, un-iced                   | Sugar             | 12  |
|                                                    | Vegetable oil     | 10  |
|                                                    | Egg powder        | 6   |
| Biscuit, savoury, corn cake                        | Maize             | 99  |
|                                                    | Vegetable oil     | 1   |
| Rice cracker, plain                                | Rice              | 197 |
|                                                    | Vegetable oil     | 511 |
| Biscuit, savoury, white wheat flour, water cracker | Flour, wheat      | 88  |
|                                                    | Vegetable oil     | 12  |
|                                                    | Cornflour         | 11  |
| Cone, for ice-cream                                | Wheat flour       | 58  |
|                                                    | Vegetable oil     | 8   |
|                                                    | Sugar             | 23  |
|                                                    | Flour, wheat      | 35  |
|                                                    | Sugar             | 24  |
| Biscuit, sweet, oat                                | Oats              | 13  |
|                                                    | Coconut           | 8   |
|                                                    | Butter            | 15  |
|                                                    | Vegetable oil     | 5   |
|                                                    | Flour, wheat      | 40  |
|                                                    | Sugar             | 40  |
| Biscuit, sweet with cream filling                  | Palm oil          | 18  |
|                                                    | Cocoa powder      | 1   |
|                                                    | Condensed milk    | 1   |
|                                                    | Mixed dried fruit | 20  |
| Muesli, natural with dried fruit (nut free)        | Oats              | 64  |
|                                                    | Wheat bran        | 13  |
|                                                    | Wheat germ        | 3   |
| Pasta, from wheat                                  | Wheat             | 100 |
|                                                    | Malt barley       | 16  |
|                                                    | Rice              | 19  |
| Chocolate and malt powder                          | Milk solids       | 25  |
|                                                    | Sugar             | 25  |
|                                                    | Cocoa             | 15  |
|                                                    | Sugar             | 27  |
|                                                    | Flour, wheat      | 34  |
| Madeira cake                                       | Vegetable oil     | 14  |
|                                                    | Water             | 5   |
|                                                    | Egg               | 20  |
|                                                    | Flour, wheat      | 74  |
| Croissant                                          | Butter            | 18  |
|                                                    | Milk powder       | 4   |

|                                              |                   |     |
|----------------------------------------------|-------------------|-----|
|                                              | Sugar             | 4   |
|                                              | Flour, wheat      | 53  |
|                                              | Water             | 12  |
| Doughnut, iced                               | Vegetable oil     | 16  |
|                                              | Sugar             | 14  |
|                                              | Other             | 5   |
|                                              | Flour, wheat      | 26  |
| Biscuit, chocolate coated and cream filled   | Milk chocolate    | 38  |
|                                              | Sugar             | 24  |
|                                              | Vegetable oil     | 11  |
|                                              | Other             | 1   |
|                                              | Condensed milk    | 1   |
|                                              | Sugar             | 22  |
| Biscuit, arrowroot                           | Vegetable oil     | 11  |
|                                              | Flour, wheat      | 65  |
|                                              | Other             | 1   |
|                                              | Wheat, flour      | 90  |
| Crispbread, plain                            | Vegetable oil     | 7   |
|                                              | Sugar             | 0.4 |
|                                              | Other             | 3   |
|                                              | Wheat, wholegrain | 47  |
|                                              | Corn              | 20  |
| Breakfast cereal, mixed grain                | Mixed dried fruit | 7   |
|                                              | Sugar             | 17  |
|                                              | Bran              | 7   |
|                                              | Other             | 2   |
|                                              | Corn              | 55  |
| Breakfast cereal, corn flakes frosted        | Sugar             | 41  |
|                                              | Other             | 4   |
|                                              | Rice              | 59  |
| Breakfast cereal, puffed rice with chocolate | Sugar             | 37  |
|                                              | Cocoa             | 3   |
|                                              | Other             | 1   |
|                                              | Corn flakes       | 89  |
| Breakfast cereal, corn flakes                | Sugar             | 8   |
|                                              | Other             | 3   |
|                                              | Rice              | 90  |
| Breakfast cereal, puffed rice                | Sugar             | 9   |
|                                              | Other             | 1   |
|                                              | Oat flakes        | 45  |
|                                              | Barley            | 5   |
| Breakfast cereal, oat clusters with nuts     | Oat flour         | 3   |
|                                              | Sugar             | 23  |
|                                              | Vegetable oil     | 14  |
|                                              | Rice flour        | 5   |

|                                           |                                        |      |
|-------------------------------------------|----------------------------------------|------|
|                                           | Nuts                                   | 5    |
|                                           | Oat                                    | 58   |
| Breakfast cereal, oat clusters with fruit | Sugar                                  | 21   |
|                                           | Vegetable oil                          | 10   |
|                                           | Rice flour                             | 9    |
|                                           | Dried fruit                            | 2    |
|                                           | Wheat, wholegrain                      | 97   |
| Breakfast cereal, wheat biscuits          | Sugar                                  | 3    |
| Corn chips, without flavouring            | Corn                                   | 73   |
|                                           | Oil                                    | 27   |
| Chips (crisps), potato                    | Potato                                 | 347  |
|                                           | Oil                                    | 38   |
| Sauce, tomato                             | Tomato                                 | 156  |
|                                           | Sugar                                  | 24   |
| Jam, stone fruit                          | Sugar                                  | 40   |
|                                           | Fruit                                  | 40   |
|                                           | Water                                  | 20   |
|                                           | Sugar                                  | 37   |
| Cordial, concentrate, citrus base         | Orange juice                           | 13   |
|                                           | Pineapple juice                        | 13   |
|                                           | Other citrus juice                     | 6    |
| Cordial, concentrate, not juice based     | Sugar                                  | 40   |
|                                           | Glucose and dextrose from wheat starch | 25   |
| Lolly, jube type                          | Glucose and dextrose from corn starch  | 25   |
|                                           | Sugar                                  | 25   |
|                                           | Milk                                   | 188  |
| Milk chocolate                            | Sugar                                  | 46   |
|                                           | Cocoa products                         | 30   |
| Tofu                                      | Soy bean                               | 21   |
| Soy beverage                              | Soy bean                               | 4.7  |
|                                           | Vegetable oil                          | 1    |
| Almond beverage                           | Almond flour                           | 3    |
|                                           | Vegetable oil                          | 0.5  |
| Rice beverage                             | Rice flour                             | 14   |
|                                           | Vegetable oil                          | 0.5  |
| Flavoured milk                            | Flavour                                | 1    |
|                                           | Sugar                                  | 5    |
|                                           | Milk                                   | 94   |
| Rum                                       | Molasses                               | 109  |
| Beer                                      | Hops                                   | 0.25 |
|                                           | Malt (Barley)                          | 15   |
| Juice (various)                           | Apple                                  | 154  |
|                                           | Orange                                 | 180  |
|                                           | Lemon                                  | 250  |
|                                           | Grapefruit                             | 200  |

|                             |                  |     |
|-----------------------------|------------------|-----|
|                             | Citrus, other    | 200 |
|                             | Grape            | 133 |
|                             | Pineapple        | 500 |
|                             | Fruit, other     | 200 |
|                             | Vegetable, mixed | 200 |
| Sports drink                | Sugar            | 7   |
| Soft drink, sugar sweetened | Sugar            | 11  |
|                             | Canola oil       | 50  |
| Margarine                   | Sunflower oil    | 15  |
|                             | Water            | 35  |
|                             | Yogurt, plain    | 94  |
| Yogurt, sweetened           | Sugar            | 6   |
|                             | Ice-cream        | 87  |
| Ice-cream, regular          | Sugar            | 13  |

---

**Supplementary Table 9** Water-scarcity footprint (L-eq kg<sup>-1</sup>) of individual foods calculated using three water-scarcity models: WSI\_HH\_EQ [2], World\_EQ [3] and AWARE [4].

| Food                                     | Description         | WSI_HH_EQ | World_EQ | AWARE   |
|------------------------------------------|---------------------|-----------|----------|---------|
| Almond                                   | Edible portion      | 1524.2    | 3447.9   | 10187.6 |
| Almond beverage                          |                     | 47.6      | 107.5    | 318.0   |
| Apple juice                              |                     | 21.2      | 51.5     | 118.2   |
| Apple pie                                |                     | 18.1      | 38.4     | 98.8    |
| Apples                                   | Edible portion      | 13.7      | 32.9     | 76.2    |
| Apricot (Dried)                          | Dried, edible       | 1120.3    | 3363.9   | 7758.4  |
| Aquaculture salmon                       | Edible portion      | 15.5      | 51.7     | 89.4    |
| Arrowroot biscuit                        |                     | 35.1      | 63.1     | 197.4   |
| Avocado                                  | Edible portion      | 113.1     | 120.2    | 287.4   |
| Barley                                   | Uncooked            | 6.1       | 22.8     | 43.8    |
| Balsamic vinegar                         |                     | 12.5      | 32.2     | 85.8    |
| Beef meat                                | Fresh, without bone | 39.0      | 131.3    | 258.3   |
| Beef offal                               | Fresh               | 22.1      | 74.6     | 146.7   |
| Beer                                     |                     | 1.8       | 7.7      | 12.0    |
| Biscuit, chocolate and cream filling     |                     | 145.1     | 216.1    | 662.0   |
| Biscuit, savoury, corn cake              |                     | 40.5      | 95.6     | 282.3   |
| Biscuit, savoury, white wheat flour      |                     | 6.3       | 23.6     | 44.1    |
| Bread, wheat, white                      |                     | 3.5       | 13.1     | 24.6    |
| Bread, wheat, wholemeal                  |                     | 3.0       | 11.3     | 21.1    |
| Breakfast cereal, puffed rice, chocolate |                     | 216.9     | 977.1    | 1766.4  |
| Breakfast cereal mix grain               |                     | 71.8      | 188.3    | 468.5   |
| Breakfast cereal, corn flakes            |                     | 37.0      | 83.1     | 244.0   |
| Breakfast cereal, frosted corn flakes    |                     | 39.3      | 63.8     | 199.5   |
| Breakfast cereal, oat cluster fruit      |                     | 83.9      | 277.4    | 602.6   |
| Breakfast cereal, oat cluster nut        |                     | 134.8     | 337.2    | 902.7   |
| Breakfast cereal, puffed rice            |                     | 292.9     | 1464.4   | 2577.6  |
| Breakfast cereal, wheat biscuit          |                     | 5.5       | 16.4     | 33.1    |
| Brown Rice                               | Uncooked            | 321.1     | 1623.4   | 2850.7  |
| Butter                                   |                     | 241.5     | 1025.6   | 1907.1  |
| Cake or cupcake, chocolate               | Sugar based icing   | 44.3      | 47.5     | 160.7   |
| Cake, fruit, commercial, un-iced         |                     | 294.3     | 822.1    | 1990.5  |
| Cake, lamington                          | Unfilled            | 70.1      | 156.9    | 195.7   |
| Canola oil                               | Refined, edible     | 36.1      | 136.5    | 255.8   |
| Cheese                                   |                     | 181.1     | 769.2    | 1430.3  |
| Chips (crisps), potato                   |                     | 190.8     | 377.2    | 1070.5  |
| Chocolate and malt powder                | Unmixed             | 206.2     | 692.9    | 1385.6  |
| Cider                                    |                     | 21.7      | 54.2     | 120.9   |
| Citrus fruit                             | Edible portion      | 116.3     | 222.3    | 743.0   |
| Cocoa powder                             | Unsweetened         | 363.3     | 216.6    | 1175.9  |
| Coconut, desiccated                      |                     | 319.3     | 1275.2   | 302.7   |
| Coffee                                   | Roasted bean        | 1283.1    | 1085.1   | 767.3   |
| Cone for ice-cream                       | Cone only           | 28.4      | 47.6     | 150.6   |

|                                                      |                      |        |        |        |
|------------------------------------------------------|----------------------|--------|--------|--------|
| Cordial, 50% juice, citrus                           | Concentrate, unmixed | 72.7   | 111.1  | 361.1  |
| Cordial, lime flavouring                             | Concentrate, unmixed | 18.4   | 14.7   | 55.0   |
| Corn flour                                           |                      | 37.3   | 89.9   | 261.6  |
| Corn chips                                           |                      | 78.9   | 166.3  | 534.6  |
| Cream                                                |                      | 135.0  | 573.1  | 1065.7 |
| Crispbread, wheat based, refined                     |                      | 17.3   | 41.6   | 116.4  |
| Crispbread, wholegrain                               |                      | 23.4   | 49.4   | 153.9  |
| Croissant                                            |                      | 60.0   | 246.9  | 462.2  |
| Custard                                              |                      | 34.3   | 136.3  | 257.7  |
| Danish pastry with custard                           |                      | 27.3   | 79.8   | 169.9  |
| Eggs                                                 | Whole, without shell | 62.8   | 127.8  | 313.7  |
| Extruded cheese snack                                |                      | 160.7  | 762.3  | 1382.3 |
| Flavoured milk, chocolate                            |                      | 39.3   | 145.7  | 282.2  |
| Flavoured milk, other                                |                      | 35.6   | 143.6  | 270.5  |
| Game meat                                            |                      | 1.2    | 7.6    | 5.9    |
| Grape juice                                          |                      | 122.5  | 304.7  | 847.4  |
| Grapes                                               | Edible portion       | 92.0   | 228.5  | 636.5  |
| Hazelnut spread                                      |                      | 555.4  | 1066.1 | 1459.7 |
| Honey                                                |                      | 0.2    | 1.0    | 0.6    |
| Ice-cream regular fat                                |                      | 61.5   | 240.1  | 455.9  |
| Iced doughnut                                        |                      | 39.1   | 73.3   | 237.2  |
| Jam, stone fruit                                     |                      | 104.5  | 273.3  | 651.1  |
| Juice, fruit & vegetable blend                       |                      | 109.5  | 215.2  | 638.0  |
| Lamb meat                                            | Fresh, without bone  | 27.7   | 60.6   | 128.5  |
| Lamb offal                                           | Fresh                | 12.6   | 27.5   | 58.4   |
| Liquorice                                            |                      | 18.8   | 18.7   | 61.8   |
| Lobster                                              | Edible portion       | 2.8    | 13.4   | 9.3    |
| Lolly, jube type                                     |                      | 24.9   | 44.9   | 127.8  |
| Madeira cake                                         |                      | 31.6   | 60.4   | 146.9  |
| Margarine                                            |                      | 70.4   | 160.8  | 473.1  |
| Mayonnaise                                           | Regular fat          | 233.3  | 407.8  | 1521.5 |
| Meat pie                                             |                      | 17.8   | 52.2   | 114.3  |
| Milk chocolate                                       |                      | 292.5  | 421.8  | 1251.3 |
| Muesli or snack bar, with chocolate chips or coating |                      | 158.5  | 312.4  | 918.6  |
| Muesli, natural with dried fruit (nut free)          |                      | 160.5  | 463.4  | 1112.3 |
| Muffin, cake-style, berry, commercial, un-iced       |                      | 85.7   | 203.9  | 539.7  |
| Muesli bar with fruit/nut                            |                      | 271.7  | 646.6  | 1827.8 |
| Muesli bar with nuts/seeds                           |                      | 125.0  | 284.9  | 835.4  |
| Oat biscuit, sweet                                   |                      | 76.0   | 255.1  | 355.1  |
| Oats                                                 | Uncooked             | 6.3    | 23.4   | 45.1   |
| Olive oil                                            |                      | 962.8  | 2890.7 | 6668.0 |
| Orange juice                                         |                      | 209.5  | 401.0  | 1338.3 |
| Other citrus juice                                   |                      | 232.7  | 445.4  | 1486.9 |
| Other nut                                            | Edible portion       | 1020.7 | 2308.9 | 6822.2 |
| Palm oil                                             |                      | 1.4    | 5.3    | 5.2    |
| Pasta from wheat                                     | Dry, uncooked        | 4.9    | 18.4   | 35.0   |
| Pastry (shortcrust)                                  |                      | 13.1   | 31.1   | 78.3   |
| Pasty, filled with vegetables & meat                 |                      | 32.7   | 72.4   | 190.6  |

|                                          |                                  |        |        |        |
|------------------------------------------|----------------------------------|--------|--------|--------|
| Peanut                                   | Edible portion                   | 186.7  | 744.3  | 1398.2 |
| Peanut oil                               | Refined, edible                  | 345.6  | 1377.9 | 2588.3 |
| Pears                                    | Edible portion                   | 9.6    | 32.0   | 61.7   |
| Pig meat                                 | Fresh, without bone              | 44.8   | 94.7   | 235.9  |
| Pig offal                                | Fresh                            | 8.6    | 18.2   | 45.4   |
| Pineapple juice                          |                                  | 115.5  | 146.9  | 373.1  |
| Plantation fruit                         | Edible portion                   | 23.1   | 29.2   | 74.4   |
| Popcorn                                  |                                  | 64.7   | 138.3  | 438.9  |
| Poultry meat                             | Fresh, without bone              | 41.4   | 95.2   | 216.0  |
| Poultry offal                            | Fresh                            | 21.1   | 48.4   | 109.7  |
| Prawn                                    | Edible portion                   | 3.1    | 14.7   | 10.2   |
| Processed beef products                  |                                  | 40.6   | 141.6  | 266.3  |
| Processed lamb products                  |                                  | 29.3   | 71.0   | 136.5  |
| Processed pig meat products              |                                  | 46.4   | 105.1  | 243.9  |
| Processed poultry products               |                                  | 43.1   | 105.5  | 223.9  |
| Quiche Lorraine                          |                                  | 72.6   | 263.0  | 515.0  |
| Reduced fat milk                         |                                  | 24.9   | 105.6  | 196.3  |
| Rice cake, wholegrain                    |                                  | 319.8  | 1611.4 | 2835.3 |
| Rice cracker, plain                      |                                  | 366.4  | 1818.5 | 3229.4 |
| Rice flour                               |                                  | 366.9  | 1855.4 | 3258.0 |
| Rice milk                                |                                  | 46.9   | 231.4  | 411.5  |
| Rum                                      |                                  | 12.5   | 20.7   | 43.3   |
| Rye flour                                |                                  | 5.5    | 20.6   | 39.7   |
| Safflower oil                            | Refined, edible                  | 38.7   | 146.1  | 273.8  |
| Sauce, tomato, commercial                |                                  | 42.0   | 97.5   | 230.7  |
| Sausage, beef                            |                                  | 51.1   | 206.1  | 377.7  |
| Sausage, chicken                         |                                  | 52.9   | 179.0  | 345.9  |
| Sausage, lamb                            |                                  | 42.6   | 153.1  | 280.3  |
| Sausage, pork                            |                                  | 55.4   | 178.7  | 360.9  |
| Soft drink, diet                         |                                  | 0.2    | 1.2    | 1.3    |
| Soft drink, sugar sweetened              |                                  | 5.2    | 5.0    | 16.0   |
| Soy milk                                 |                                  | 10.1   | 33.2   | 72.6   |
| Soy sauce                                |                                  | 25.2   | 100.8  | 188.1  |
| Soybean oil                              | Refined, edible                  | 268.1  | 1068.9 | 2007.8 |
| Sports drink                             |                                  | 3.4    | 3.6    | 10.6   |
| Starchy root veg                         | Edible portion                   | 39.9   | 79.6   | 198.4  |
| Stone fruit                              | Edible portion, includes berries | 215.4  | 646.9  | 1492.0 |
| Sugar                                    | Refined                          | 45.4   | 33.9   | 134.1  |
| Sultana (Dried grape)                    | Dried, edible                    | 432.2  | 1073.8 | 2991.6 |
| Sunflower oil                            | Refined, edible                  | 347.7  | 611.5  | 2297.0 |
| Sweet biscuit with cream filling         |                                  | 24.8   | 26.6   | 85.1   |
| Tea                                      | Dried leaves                     | 4289.9 | 3462.1 | 2414.4 |
| Tofu                                     |                                  | 29.4   | 117.7  | 219.9  |
| Tropical stone fruit                     | Edible portion                   | 119.5  | 125.3  | 302.9  |
| Veg, excluding starchy roots and avocado | Edible portion                   | 44.5   | 88.2   | 221.2  |
| Water, bottled                           |                                  | 0.2    | 0.9    | 0.9    |
| Water, tap                               |                                  | 0.1    | 0.6    | 0.6    |
| Wheat bran                               |                                  | 6.3    | 23.5   | 45.3   |

|                         |                                                  |       |        |        |
|-------------------------|--------------------------------------------------|-------|--------|--------|
| Wheat flour, white      |                                                  | 4.9   | 18.1   | 34.8   |
| Wheat flour, wholegrain |                                                  | 4.2   | 15.5   | 29.8   |
| White rice              | Uncooked                                         | 366.9 | 1855.4 | 3258.0 |
| Whole milk              |                                                  | 35.5  | 150.8  | 280.5  |
| Whole milk powder       |                                                  | 277.0 | 1176.4 | 2187.6 |
| Wild capture fish       | Edible portion                                   | 5.2   | 24.4   | 16.9   |
| Wine                    | Red or white                                     | 131.7 | 328.3  | 911.3  |
| Winter legumes          | Lupin, chickpea, faba,<br>Lentil (canned/soaked) | 2.6   | 5.9    | 11.3   |
| Yogurt, plain           |                                                  | 39.1  | 165.9  | 308.5  |
| Yogurt, sweetened       |                                                  | 39.4  | 158.0  | 298.0  |

Note: Results presented using the AWARE water-scarcity model have been divided by 42.95, the global average value.

**Supplementary Table 10** Water-scarcity footprint results for Australian adult daily diets. Results are presented for 3 water-scarcity models, denoted WSI\_HH\_EQ [2], World\_EQ [3] and AWARE [4]. Age categories are defined according to the Australian dietary guidelines [1].

| Age        | Water-scarcity model | Male  |       | Female |       | Total |       |
|------------|----------------------|-------|-------|--------|-------|-------|-------|
|            |                      | Mean  | SD    | Mean   | SD    | Mean  | SD    |
| 19 to 50   | WSI_HH_EQ            | 143.3 | 80.5  | 134.8  | 74.8  | 139.2 | 77.9  |
|            | World_EQ             | 386.3 | 232.4 | 343.3  | 209.9 | 365.3 | 222.7 |
|            | AWARE                | 837.4 | 523.0 | 753.3  | 483.5 | 796.4 | 505.9 |
| 51 to 70   | WSI_HH_EQ            | 154.1 | 83.5  | 154.2  | 80.1  | 154.1 | 81.8  |
|            | World_EQ             | 379.9 | 227.4 | 365.8  | 213.7 | 372.8 | 220.8 |
|            | AWARE                | 835.2 | 537.2 | 807.8  | 511.1 | 821.5 | 524.5 |
| 71+        | WSI_HH_EQ            | 135.0 | 67.2  | 131.7  | 68.2  | 133.1 | 67.7  |
|            | World_EQ             | 323.9 | 175.1 | 309.7  | 179.8 | 315.8 | 177.9 |
|            | AWARE                | 713.2 | 426.8 | 673.9  | 438.7 | 690.9 | 434.0 |
| All adults | WSI_HH_EQ            | 145.6 | 80.5  | 139.8  | 76.1  | 142.7 | 78.4  |
|            | World_EQ             | 379.1 | 227.3 | 345.6  | 208.4 | 362.4 | 218.7 |
|            | AWARE                | 826.1 | 520.5 | 759.3  | 488.0 | 792.8 | 505.7 |

Note: Results presented using the AWARE water-scarcity model have been divided by 42.95, the global average value

**Supplementary Table 11:** Contribution of different foods (%) to the water-scarcity footprint calculated using the WSI\_HH\_EQ [2] model.

|                                            | 19-50 years |        |       | 51-70 years |        |       | 71 years and older |        |       | Total |        |       |
|--------------------------------------------|-------------|--------|-------|-------------|--------|-------|--------------------|--------|-------|-------|--------|-------|
|                                            | Male        | Female | Total | Male        | Female | Total | Male               | Female | Total | Male  | Female | Total |
| Fruit                                      | 16.8        | 19.1   | 17.9  | 16.7        | 20.0   | 18.3  | 22.2               | 21.2   | 21.6  | 17.2  | 19.6   | 18.4  |
| Vegetables                                 | 7.0         | 8.1    | 7.5   | 7.8         | 7.9    | 7.8   | 9.1                | 8.7    | 8.9   | 7.4   | 8.1    | 7.8   |
| Breads and cereals                         | 11.4        | 9.7    | 10.6  | 7.6         | 6.4    | 7.0   | 5.4                | 5.2    | 5.3   | 9.8   | 8.3    | 9.1   |
| Meat and alternatives                      | 12.2        | 10.3   | 11.3  | 12.1        | 10.8   | 11.4  | 9.1                | 9.2    | 9.1   | 11.9  | 10.3   | 11.1  |
| Fish                                       | 0.3         | 0.3    | 0.3   | 0.4         | 0.5    | 0.5   | 0.2                | 0.3    | 0.2   | 0.3   | 0.4    | 0.4   |
| Red meat (no pork)                         | 3.5         | 2.6    | 3.1   | 3.8         | 2.9    | 3.3   | 3.1                | 2.6    | 2.8   | 3.6   | 2.7    | 3.1   |
| Poultry                                    | 4.0         | 3.1    | 3.5   | 2.4         | 2.4    | 2.4   | 2.3                | 2.1    | 2.1   | 3.4   | 2.8    | 3.1   |
| Vegetarian meat alt and nuts               | 3.6         | 3.9    | 3.7   | 4.9         | 4.5    | 4.7   | 3.3                | 3.7    | 3.5   | 3.9   | 4.1    | 4.0   |
| Other                                      | 0.0         | 0.0    | 0.0   | 0.0         | 0.0    | 0.0   | 0.0                | 0.0    | 0.0   | 0.0   | 0.0    | 0.0   |
| Pork                                       | 0.9         | 0.4    | 0.6   | 0.6         | 0.5    | 0.5   | 0.3                | 0.5    | 0.4   | 0.7   | 0.4    | 0.6   |
| Dairy                                      | 13.6        | 11.8   | 12.7  | 9.1         | 9.9    | 9.5   | 9.2                | 9.7    | 9.4   | 12.0  | 11.0   | 11.5  |
| Beverages                                  | 10.8        | 15.6   | 13.1  | 20.4        | 22.3   | 21.4  | 21.4               | 26.2   | 24.1  | 14.3  | 18.7   | 16.5  |
| Discretionary foods                        | 26.4        | 23.9   | 25.2  | 24.8        | 20.8   | 22.8  | 22.0               | 18.4   | 20.0  | 25.6  | 22.4   | 24.0  |
| Sugar sweetened beverages                  | 2.2         | 1.5    | 1.8   | 1.1         | 0.7    | 0.9   | 0.7                | 0.6    | 0.6   | 1.7   | 1.2    | 1.5   |
| Savoury and sweet biscuits                 | 2.0         | 2.4    | 2.2   | 2.0         | 2.0    | 2.0   | 2.8                | 2.9    | 2.8   | 2.1   | 2.3    | 2.2   |
| Sweet and savoury pastries and pies        | 0.9         | 0.8    | 0.8   | 0.9         | 0.6    | 0.8   | 0.6                | 0.4    | 0.5   | 0.9   | 0.7    | 0.8   |
| Processed meat, burgers, tacos, pizza      | 6.2         | 4.1    | 5.2   | 3.3         | 1.8    | 2.6   | 2.5                | 2.1    | 2.3   | 5.1   | 3.3    | 4.2   |
| Dairy based desserts, cream, butter        | 2.0         | 1.8    | 1.9   | 3.0         | 1.7    | 2.3   | 3.5                | 2.7    | 3.1   | 2.4   | 1.9    | 2.1   |
| Fried potato and extruded snacks           | 3.6         | 2.3    | 3.0   | 1.7         | 0.7    | 1.2   | 0.8                | 0.7    | 0.8   | 2.8   | 1.7    | 2.3   |
| Muesli bars, confectionary and choc        | 3.0         | 3.4    | 3.2   | 2.9         | 2.9    | 2.9   | 2.4                | 2.1    | 2.2   | 3.0   | 3.1    | 3.0   |
| Alcohol                                    | 4.8         | 5.8    | 5.3   | 8.6         | 8.8    | 8.7   | 7.2                | 5.2    | 6.1   | 6.0   | 6.5    | 6.3   |
| Other - stock cubes, salt, dry soups, etc. | 1.7         | 1.8    | 1.8   | 1.3         | 1.6    | 1.4   | 1.6                | 1.8    | 1.7   | 1.6   | 1.8    | 1.7   |
| Healthy fats and oils                      | 0.8         | 1.0    | 0.9   | 1.2         | 1.3    | 1.2   | 1.1                | 1.0    | 1.0   | 0.9   | 1.1    | 1.0   |
| Misc.                                      | 1.0         | 0.6    | 0.8   | 0.4         | 0.6    | 0.5   | 0.7                | 0.3    | 0.5   | 0.8   | 0.5    | 0.7   |

**Supplementary Table 12:** Contribution of different foods (%) to the water-scarcity footprint calculated using the World\_EQ [3] model.

|                                            | 19-50 years |        |       | 51-70 years |        |       | 71 years and older |        |       | Total |        |       |
|--------------------------------------------|-------------|--------|-------|-------------|--------|-------|--------------------|--------|-------|-------|--------|-------|
|                                            | Male        | Female | Total | Male        | Female | Total | Male               | Female | Total | Male  | Female | Total |
| Fruit                                      | 16.6        | 19.3   | 17.9  | 17.7        | 21.7   | 19.7  | 23.6               | 22.9   | 23.2  | 17.5  | 20.3   | 18.9  |
| Vegetables                                 | 6.1         | 7.4    | 6.7   | 7.1         | 7.4    | 7.3   | 8.4                | 8.3    | 8.3   | 6.5   | 7.5    | 7.0   |
| Breads and cereals                         | 15.1        | 13.7   | 14.4  | 11.1        | 9.3    | 10.2  | 7.7                | 7.8    | 7.8   | 13.4  | 11.8   | 12.6  |
| Meat and alternatives                      | 12.2        | 10.7   | 11.5  | 13.1        | 12.1   | 12.6  | 9.9                | 10.2   | 10.1  | 12.3  | 11.0   | 11.6  |
| Fish                                       | 0.4         | 0.4    | 0.4   | 0.6         | 0.7    | 0.6   | 0.3                | 0.4    | 0.4   | 0.4   | 0.5    | 0.5   |
| Red meat (no pork)                         | 3.9         | 3.0    | 3.5   | 4.7         | 3.7    | 4.2   | 3.7                | 3.3    | 3.5   | 4.1   | 3.2    | 3.7   |
| Poultry                                    | 3.6         | 3.1    | 3.4   | 2.4         | 2.6    | 2.5   | 2.4                | 2.3    | 2.3   | 3.2   | 2.8    | 3.0   |
| Vegetarian meat alt and nuts               | 3.4         | 3.8    | 3.6   | 5.0         | 4.6    | 4.8   | 3.3                | 3.7    | 3.5   | 3.8   | 4.0    | 3.9   |
| Other                                      | 0.0         | 0.0    | 0.0   | 0.0         | 0.0    | 0.0   | 0.0                | 0.0    | 0.0   | 0.0   | 0.0    | 0.0   |
| Pork                                       | 0.8         | 0.4    | 0.6   | 0.5         | 0.5    | 0.5   | 0.3                | 0.5    | 0.4   | 0.7   | 0.4    | 0.6   |
| Dairy                                      | 17.6        | 16.3   | 17.0  | 13.8        | 15.1   | 14.4  | 15.0               | 15.9   | 15.5  | 16.3  | 15.9   | 16.1  |
| Beverages                                  | 4.8         | 7.0    | 5.9   | 8.8         | 9.9    | 9.4   | 8.8                | 12.2   | 10.7  | 6.2   | 8.4    | 7.3   |
| Discretionary foods                        | 25.7        | 24.1   | 24.9  | 26.7        | 22.4   | 24.6  | 24.8               | 21.2   | 22.8  | 25.9  | 23.3   | 24.6  |
| Sugar sweetened beverages                  | 1.1         | 0.8    | 1.0   | 0.6         | 0.4    | 0.5   | 0.4                | 0.4    | 0.4   | 0.9   | 0.7    | 0.8   |
| Savoury and sweet biscuits                 | 1.8         | 2.4    | 2.1   | 2.1         | 2.2    | 2.1   | 2.8                | 3.1    | 3.0   | 2.0   | 2.4    | 2.2   |
| Sweet and savoury pastries and pies        | 0.9         | 0.9    | 0.9   | 1.0         | 0.7    | 0.8   | 0.7                | 0.5    | 0.6   | 0.9   | 0.8    | 0.9   |
| Processed meat, burgers, tacos, pizza      | 7.1         | 4.8    | 6.0   | 4.3         | 2.4    | 3.3   | 3.4                | 2.9    | 3.1   | 6.0   | 3.9    | 5.0   |
| Dairy based desserts, cream, butter        | 2.8         | 2.6    | 2.7   | 4.4         | 2.8    | 3.6   | 5.6                | 4.5    | 5.0   | 3.5   | 2.8    | 3.2   |
| Fried potato and extruded snacks           | 3.0         | 2.1    | 2.6   | 1.4         | 0.7    | 1.1   | 0.8                | 0.8    | 0.8   | 2.4   | 1.6    | 2.0   |
| Muesli bars, confectionary and choc        | 2.3         | 2.7    | 2.5   | 2.3         | 2.4    | 2.3   | 1.9                | 1.8    | 1.8   | 2.3   | 2.5    | 2.4   |
| Alcohol                                    | 5.1         | 5.9    | 5.5   | 9.5         | 9.3    | 9.4   | 7.8                | 5.6    | 6.5   | 6.5   | 6.8    | 6.7   |
| Other - stock cubes, salt, dry soups, etc. | 1.6         | 1.8    | 1.7   | 1.3         | 1.6    | 1.4   | 1.5                | 1.7    | 1.6   | 1.5   | 1.7    | 1.6   |
| Healthy fats and oils                      | 0.7         | 0.8    | 0.8   | 1.1         | 1.2    | 1.2   | 1.0                | 0.9    | 1.0   | 0.8   | 0.9    | 0.9   |
| Misc.                                      | 1.3         | 0.7    | 1.0   | 0.4         | 0.8    | 0.6   | 0.7                | 0.5    | 0.6   | 1.0   | 0.7    | 0.9   |

**Supplementary Table 13:** Contribution of different foods (%) to the water-scarcity footprint calculated using the AWARE [4] model.

|                                            | 19-50 years |        |       | 51-70 years |        |       | 71 years and older |        |       | Total |        |       |
|--------------------------------------------|-------------|--------|-------|-------------|--------|-------|--------------------|--------|-------|-------|--------|-------|
|                                            | Male        | Female | Total | Male        | Female | Total | Male               | Female | Total | Male  | Female | Total |
| Fruit                                      | 18.2        | 21.0   | 19.6  | 19.5        | 23.7   | 21.6  | 26.0               | 25.6   | 25.8  | 19.2  | 22.3   | 20.7  |
| Vegetables                                 | 6.9         | 8.3    | 7.6   | 8.2         | 8.6    | 8.4   | 9.7                | 9.8    | 9.7   | 7.5   | 8.5    | 8.0   |
| Breads and cereals                         | 14.3        | 12.9   | 13.6  | 10.6        | 8.9    | 9.8   | 7.5                | 7.5    | 7.5   | 12.7  | 11.2   | 12.0  |
| Meat and alternatives                      | 12.9        | 11.6   | 12.3  | 14.3        | 13.3   | 13.8  | 10.6               | 11.5   | 11.1  | 13.1  | 12.0   | 12.6  |
| Fish                                       | 0.3         | 0.3    | 0.3   | 0.4         | 0.6    | 0.5   | 0.2                | 0.3    | 0.2   | 0.3   | 0.4    | 0.4   |
| Red meat (no pork)                         | 3.9         | 3.0    | 3.5   | 4.8         | 3.7    | 4.3   | 3.8                | 3.5    | 3.6   | 4.1   | 3.3    | 3.7   |
| Poultry                                    | 3.9         | 3.3    | 3.6   | 2.6         | 2.9    | 2.7   | 2.5                | 2.6    | 2.5   | 3.4   | 3.1    | 3.3   |
| Vegetarian meat alt and nuts               | 3.9         | 4.5    | 4.2   | 5.8         | 5.6    | 5.7   | 3.8                | 4.5    | 4.2   | 4.4   | 4.8    | 4.6   |
| Other                                      | 0.0         | 0.0    | 0.0   | 0.0         | 0.0    | 0.0   | 0.0                | 0.0    | 0.0   | 0.0   | 0.0    | 0.0   |
| Pork                                       | 0.9         | 0.4    | 0.6   | 0.6         | 0.5    | 0.6   | 0.3                | 0.5    | 0.5   | 0.8   | 0.5    | 0.6   |
| Dairy                                      | 15.5        | 14.4   | 14.9  | 12.3        | 13.6   | 13.0  | 13.5               | 14.5   | 14.1  | 14.4  | 14.2   | 14.3  |
| Beverages                                  | 2.1         | 3.0    | 2.6   | 3.7         | 4.1    | 3.9   | 3.5                | 5.5    | 4.7   | 2.7   | 3.6    | 3.1   |
| Discretionary foods                        | 28.2        | 27.1   | 27.6  | 29.7        | 25.6   | 27.6  | 27.2               | 24.0   | 25.4  | 28.5  | 26.3   | 27.4  |
| Sugar sweetened beverages                  | 1.4         | 1.1    | 1.3   | 0.8         | 0.5    | 0.7   | 0.5                | 0.5    | 0.5   | 1.2   | 0.9    | 1.0   |
| Savoury and sweet biscuits                 | 2.1         | 2.7    | 2.4   | 2.3         | 2.5    | 2.4   | 3.3                | 3.6    | 3.5   | 2.3   | 2.8    | 2.5   |
| Sweet and savoury pastries and pies        | 1.1         | 1.0    | 1.0   | 1.1         | 0.8    | 1.0   | 0.7                | 0.5    | 0.6   | 1.1   | 0.9    | 1.0   |
| Processed meat, burgers, tacos, pizza      | 7.0         | 4.8    | 5.9   | 4.3         | 2.4    | 3.4   | 3.3                | 2.9    | 3.1   | 6.0   | 3.9    | 5.0   |
| Dairy based desserts, cream, butter        | 2.6         | 2.4    | 2.5   | 4.2         | 2.6    | 3.4   | 5.3                | 4.3    | 4.7   | 3.2   | 2.6    | 2.9   |
| Fried potato and extruded snacks           | 3.9         | 2.7    | 3.3   | 2.0         | 0.9    | 1.4   | 1.1                | 1.0    | 1.0   | 3.1   | 2.0    | 2.6   |
| Muesli bars, confectionary and choc        | 2.9         | 3.5    | 3.2   | 3.0         | 3.0    | 3.0   | 2.3                | 2.3    | 2.3   | 2.8   | 3.2    | 3.0   |
| Alcohol                                    | 5.3         | 6.7    | 6.0   | 10.4        | 10.7   | 10.5  | 8.8                | 6.5    | 7.5   | 7.0   | 7.8    | 7.4   |
| Other - stock cubes, salt, dry soups, etc. | 1.9         | 2.2    | 2.1   | 1.6         | 2.1    | 1.9   | 1.7                | 2.5    | 2.2   | 1.8   | 2.2    | 2.0   |
| Healthy fats and oils                      | 0.8         | 1.0    | 0.9   | 1.3         | 1.4    | 1.4   | 1.2                | 1.1    | 1.2   | 1.0   | 1.1    | 1.1   |
| Misc.                                      | 1.2         | 0.7    | 0.9   | 0.4         | 0.8    | 0.6   | 0.7                | 0.5    | 0.6   | 0.9   | 0.7    | 0.8   |

Note: Results presented using the AWARE water-scarcity model have been divided by 42.95, the global average value.

**Supplementary Table 14:** Food intake (serves person<sup>-1</sup>) and water-scarcity footprint (L-eq person<sup>-1</sup>) for Australian adult (19-50 years) daily diets. Four dietary patterns are compared: higher diet quality and lower water-scarcity footprint, lower diet quality and higher water-scarcity footprint, current diet and recommended diet as described by the Australian dietary guidelines<sup>1</sup>. Water-scarcity footprints were calculated using the WSI\_HH\_EQ model [2].

|                               | Higher diet quality & lower water-scarcity footprint |                          | Lower diet quality & higher water-scarcity footprint |                          | Current diet |                          | Recommended diet |                          |
|-------------------------------|------------------------------------------------------|--------------------------|------------------------------------------------------|--------------------------|--------------|--------------------------|------------------|--------------------------|
|                               | Serves                                               | Water-scarcity footprint | Serves                                               | Water-scarcity footprint | Serves       | Water-scarcity footprint | Serves           | Water-scarcity footprint |
| Fruit                         | 1.06                                                 | 14.2                     | 1.79                                                 | 49.6                     | 1.38         | 31.1                     | 2                | 45.0                     |
| Vegetables                    | 3.07                                                 | 10.5                     | 1.47                                                 | 7.6                      | 2.47         | 9.7                      | 5.5              | 21.5                     |
| Breads and cereals            | 4.38                                                 | 9.6                      | 4.51                                                 | 17.4                     | 4.57         | 14.8                     | 6                | 19.4                     |
| Fresh meat & alternatives     | 2.62                                                 | 13.2                     | 1.82                                                 | 13.4                     | 2.32         | 16.0                     | 2.8              | 19.3                     |
| Dairy products & alternatives | 1.26                                                 | 12.6                     | 1.59                                                 | 19.1                     | 1.46         | 16.2                     | 2.5              | 27.7                     |
| Discretionary foods           | 2.25                                                 | 9.3                      | 12.52                                                | 80.6                     | 7.42         | 32.3                     | 2.8              | 12.2                     |
| Miscellaneous foods           |                                                      | 13.9                     |                                                      | 28.6                     |              | 19.1                     |                  | 19.1                     |
| TOTAL                         |                                                      | 83.3                     |                                                      | 216.3                    |              | 139.2                    |                  | 164.3                    |

**Supplementary Table 15:** Food intake (serves person<sup>-1</sup>) and water-scarcity footprint (L-eq person<sup>-1</sup>) for Australian adult (19-50 years) daily diets. Four dietary patterns are compared: higher diet quality and lower water-scarcity footprint, lower diet quality and higher water-scarcity footprint, current diet and recommended diet as described by the Australian dietary guidelines<sup>1</sup>. Water-scarcity footprints were calculated using the World\_EQ model [3].

|                               | Higher diet quality & lower water-scarcity footprint |                          | Lower diet quality & higher water-scarcity footprint |                          | Current diet |                          | Recommended diet |                          |
|-------------------------------|------------------------------------------------------|--------------------------|------------------------------------------------------|--------------------------|--------------|--------------------------|------------------|--------------------------|
|                               | Serves                                               | Water-scarcity footprint | Serves                                               | Water-scarcity footprint | Serves       | Water-scarcity footprint | Serves           | Water-scarcity footprint |
| Fruit                         | 1.10                                                 | 35.0                     | 1.76                                                 | 120.0                    | 1.38         | 81.5                     | 2.0              | 117.9                    |
| Vegetables                    | 3.46                                                 | 25.0                     | 1.33                                                 | 15.6                     | 2.47         | 21.3                     | 5.5              | 47.3                     |
| Breads and cereals            | 3.96                                                 | 24.2                     | 5.04                                                 | 90.1                     | 4.57         | 61.6                     | 6.0              | 80.9                     |
| Fresh meat & alternatives     | 2.66                                                 | 37.1                     | 1.80                                                 | 35.9                     | 2.32         | 40.7                     | 2.8              | 49.2                     |
| Dairy products & alternatives | 1.13                                                 | 41.6                     | 1.77                                                 | 70.6                     | 1.46         | 55.9                     | 2.5              | 95.6                     |
| Discretionary foods           | 2.37                                                 | 23.9                     | 12.30                                                | 207.2                    | 7.42         | 80.6                     | 2.8              | 30.4                     |
| Miscellaneous foods           |                                                      | 19.8                     |                                                      | 34.0                     |              | 23.7                     |                  | 23.7                     |
| TOTAL                         |                                                      | 206.7                    |                                                      | 573.4                    |              | 365.3                    |                  | 445.1                    |

**Supplementary Table 16:** Food intake (serves person<sup>-1</sup>) and water-scarcity footprint (L-eq person<sup>-1</sup>) for Australian adult (19-50 years) daily diets. Four dietary patterns are compared: higher diet quality and lower water-scarcity footprint, lower diet quality and higher water-scarcity footprint, current diet and recommended diet as described by the Australian dietary guidelines<sup>1</sup>. Water-scarcity footprints were calculated using the AWARE [4] model.

|                               | Higher diet quality & lower water-scarcity footprint |                          | Lower diet quality & higher water-scarcity footprint |                          | Current diet |                          | Recommended diet |                          |
|-------------------------------|------------------------------------------------------|--------------------------|------------------------------------------------------|--------------------------|--------------|--------------------------|------------------|--------------------------|
|                               | Serves                                               | Water-scarcity footprint | Serves                                               | Water-scarcity footprint | Serves       | Water-scarcity footprint | Serves           | Water-scarcity footprint |
| Fruit                         | 1.08                                                 | 83.4                     | 2.00                                                 | 352.0                    | 1.38         | 199.9                    | 2                | 289.3                    |
| Vegetables                    | 3.40                                                 | 59.7                     | 1.32                                                 | 37.2                     | 2.47         | 51.3                     | 5.5              | 114.1                    |
| Breads and cereals            | 4.14                                                 | 58.6                     | 4.68                                                 | 142.5                    | 4.57         | 116.4                    | 6                | 153.0                    |
| Fresh meat & alternatives     | 2.67                                                 | 79.4                     | 1.65                                                 | 72.0                     | 2.32         | 97.7                     | 2.8              | 118.0                    |
| Dairy products & alternatives | 1.19                                                 | 79.3                     | 1.59                                                 | 115.9                    | 1.46         | 102.0                    | 2.5              | 174.4                    |
| Discretionary foods           | 2.28                                                 | 55.5                     | 12.94                                                | 545.5                    | 7.42         | 199.3                    | 2.8              | 75.2                     |
| Miscellaneous foods           |                                                      | 25.4                     |                                                      | 41.7                     |              | 29.8                     |                  | 29.8                     |
| TOTAL                         |                                                      | 441.2                    |                                                      | 1306.8                   |              | 796.4                    |                  | 953.8                    |

Note: Results presented using the AWARE water-scarcity model have been divided by 42.95, the global average value

## Supplementary references

1. *Australian Dietary Guidelines Summary*, National Health and Medical Research Council: Canberra, 2013.
2. Ridoutt, B.G.; Pfister, S. Water footprinting using a water stress index (WSI) that integrates stress on humans and ecosystems. Proceedings of the 3rd LCA AgriFood Asia Conference, Bangkok, Thailand, 2014.
3. Ridoutt, B.G.; Pfister, S. A revised approach to water footprinting to make transparent the impacts of consumption and production on global freshwater scarcity. *Glob. Environ. Change* **2010**, *20*, 113–20.
4. Boulay, A.M.; Bare, J.; Benini, L.; Berger, M.; Lathuillière, M.J.; Manzardo, A.; Margni, M.; Motoshita, M.; Núñez, M.; Pastor, A.V.; Ridoutt, B.; Oki, T.; Worbe, S.; Pfister, S. The WULCA consensus characterization model for water scarcity footprints: assessing impacts of water consumption based on available water remaining (AWARE). *Int. J. Life Cycle. Assess* **2018**, *23*, 368-378.
5. Pfister, S.; Bayer, P.; Koehler, A.; Hellweg, S. Environmental impacts of water use in global crop production: Hotspots and trade-offs with land use. *Environ. Sci. Technol.* **2011**, *45*, 5761-5768.
6. *TASSAL Sustainability Report 2011*, Tassal Group Limited: Australia, 2011.
7. Pahlow, M.; van Oel, P.R.; Mekonnen, M.M.; Hoekstra, A.Y. Increasing pressure on freshwater resources due to terrestrial feed ingredients for aquaculture production. *Sci. Tot. Environ.* **2015**, *536*, 847-857.
8. Ridoutt, B.; Sanguansri, P.; Alexander, D. *Environmental Performance Review: Red Meat Processing Sector 2015*, Australian Meat Processing Corporation: North Sydney, Australia, 2015.

9. Wiedmann, S.; Yan, M. Livestock meat processing: inventory data and methods for handling co-production for major livestock species and meat products. Proceedings of the 9<sup>th</sup> International Conference on Life Cycle Assessment in the Agri-Food Sector, San Francisco, USA, 2014.
10. Wiedemann, S.; McGahan, E.; Poad, G. *Using Life Cycle Assessment to Quantify the Environmental Impact of Chicken Meat Production*, Australian Government, Rural Industries Research and Development Corporation: Canberra, 2012.
11. Wiedemann, S.; McGahan, E.; Grist, S.; Grant, T. *Environmental Assessment of Two Pork Supply Chains Using Life Cycle Assessment*, Australian Government, Rural Industries Research and Development Corporation: Canberra, 2010.
12. *Environmental Sustainability Scorecard 2016-17*, Dairy Manufacturers Sustainability Council: Melbourne, Australia, 2018.
13. Lehto, M.; Sipilä, I.; Alakukku, L.; Kymäläinen, H.-R. Water consumption and wastewaters in fresh-cut vegetable production. *Agric. Food Sci.* **2014**, *23*, 246-256.
14. Vinyes, E.; Asin, L.; Alegre, S.; Muños, P.; Boschmonart, J. Life cycle assessment of apple and peach production, distribution and consumption in Mediterranean fruit sector. *J. Clean. Prod.* **2017**, *149*, 313-320.
15. Walker, C.; Beretta, C.; Sanjuán, N.; Hellweg, S. Calculating the energy and water use in food processing and assessing the resulting impacts. *Int. J. Life Cycle Assess.* **2018**, *23*, 824-839.
16. Ingwersen, W.W. Life cycle assessment of fresh pineapple from Costa Rica. *J. Clean. Prod.* **2012**, *35*, 152-163.

17. Beccali, M.; Cellura, M.; Iudicello, M.; Mistretta, M. Resource consumption and environmental impacts of the agri-food sector: Life cycle assessment of Italian citrus-based products. *Environ. Manage.* **2009**, *43*, 707-724.
18. *The Australian Life Cycle Inventory Database*;  
<http://www.auslci.com.au/index.php/Home>
19. Durlinger, B.; Koukouna, E.; Broekema, R.; van Paassen, M.; Scholten, J. *Agri-footprint 4.0*, Blonk Consultants, 2017; <http://www.agri-footprint.com/users/#methodology>
20. *Water Use Benchmarking in the Beverage Industry*, Beverage Industry Environmental Roundtable, 2010.
21. *Towards Sustainability 2007-08.*, Australian Food and Grocery Council: Canberra, 2009.
22. Farmery, A.K. An Assessment of the Environmental Performance of Seafood and the Implications for Food Systems. PhD Thesis, University of Tasmania, Australia, 2016.
23. *NUTTAB 2010 Online Searchable Database*, Food Standards Australia New Zealand, Canberra, 2015.
